# Supplementary material for: The Disease Burden of Generalized Pustular Psoriasis: Real-World Evidence From CorEvitas’ Psoriasis Registry
Source: PubMed Central journal article supplement — J Psoriasis Psoriatic Arthritis. 2022 Mar 11;7(2):71–8. doi: 10.1177/24755303221079814 (PMC11361522; doi:10.1177/24755303221079814), 2022-03-11
Supplement: sj-pdf-1-jps-10.1177_24755303221079814.pdf [file sj-pdf-1-jps-10.1177_24755303221079814.pdf]

**Table S1. GPP and plaque psoriasis characteristics stratified by disease severity, defined by BSA**

| Characteristic                 | GPP<br><3% BSA | GPP<br><3% BSA<br>sample<br>size | Plaque psoriasis<br><3% BSA | Plaque<br>psoriasis<br><3% BSA<br>sample<br>size | GPP<br>≥3% BSA  | GPP<br>≥3%<br>BSA<br>sample<br>size | Plaque psoriasis<br>≥3% BSA | Plaque<br>psoriasis<br>≥3% BSA<br>sample<br>size |
|--------------------------------|----------------|----------------------------------|-----------------------------|--------------------------------------------------|-----------------|-------------------------------------|-----------------------------|--------------------------------------------------|
| <b>Demographics</b>            |                |                                  |                             |                                                  |                 |                                     |                             |                                                  |
| Age, years, mean (SD)          | 47.0 (14.6)    | 20                               | 50.1 (14.0)                 | 1774                                             | 52.9 (14.0)     | 40                                  | 50.9 (14.4)                 | 3107                                             |
| Sex, female, n (%)             | 16 (80.0)      | 20                               | 803 (45.3)                  | 1774                                             | 20 (50.0)       | 40                                  | 1364 (43.9)                 | 3107                                             |
| Education, n (%)               |                | 20                               |                             | 1770                                             |                 | 39                                  |                             |                                                  |
| High school graduate/GED       | 8 (40.0)       |                                  | 409 (23.1)                  |                                                  | 15 (38.5)       |                                     | 777 (25.1)                  | 3099                                             |
| College graduate or higher     | 7 (35.0)       |                                  | 714 (40.3)                  |                                                  | 14 (35.9)       |                                     | 1123 (36.2)                 |                                                  |
| Work status, n (%)             |                | 20                               |                             | 1771                                             |                 | 40                                  |                             | 3102                                             |
| Full-time                      | 10 (50.0)      |                                  | 1128 (63.7)                 |                                                  | 21 (52.5)       |                                     | 1792 (57.7)                 |                                                  |
| Part-time                      | -              |                                  | 152 (8.6)                   |                                                  | -               |                                     | 246 (7.9)                   |                                                  |
| Retired                        | -              |                                  | 270 (15.2)                  |                                                  | 7 (17.5)        |                                     | 510 (16.4)                  |                                                  |
| Disabled                       | -              |                                  | 101 (5.7)                   |                                                  | 8 (20.0)        |                                     | 264 (8.5)                   |                                                  |
| Other                          | -              |                                  | 120 (6.8)                   |                                                  | -               |                                     | 290 (9.3)                   |                                                  |
| Current smoker, n (%)          | -              | 19                               | 287 (16.3)                  | 1757                                             | 8 (20.0)        | 40                                  | 534 (17.4)                  | 3074                                             |
| BMI, n (%)                     |                | 19                               |                             | 1744                                             |                 | 40                                  |                             | 3069                                             |
| ≤24.9                          | -              |                                  | 372 (21.3)                  |                                                  | 5 (12.5)        |                                     | 554 (18.1)                  |                                                  |
| 25–29.9                        | -              |                                  | 570 (32.7)                  |                                                  | 12 (30.0)       |                                     | 915 (29.8)                  |                                                  |
| ≥30                            | 12 (63.2)      |                                  | 802 (46.0)                  |                                                  | 23 (57.5)       |                                     | 1600 (52.1)                 |                                                  |
| <b>Disease characteristics</b> |                |                                  |                             |                                                  |                 |                                     |                             |                                                  |
| Psoriasis duration, years      |                | 20                               |                             | 1754                                             |                 | 40                                  |                             | 3081                                             |
| Mean (SD)                      | 11.6 (11.1)    |                                  | 15.3 (13.7)                 |                                                  | 12.3 (12.8)     |                                     | 14.2 (13.3)                 |                                                  |
| Median (IQR)                   | 6.5 (2.5–24.0) |                                  | 11.0 (4.0–24.0)             |                                                  | 9.5 (2.0–20.0)  |                                     | 10.0 (3.0–21.0)             |                                                  |
| Psoriatic arthritis, n (%)     | 13 (65.0)      | 20                               | 631 (36.5)                  | 1727                                             | 14 (35.0)       | 40                                  | 1037 (34.3)                 | 3022                                             |
| PEST 3+, n (%)                 | 10 (50.0)      | 20                               | 512 (28.9)                  | 1774                                             | 13 (32.5)       | 40                                  | 820 (26.4)                  | 3107                                             |
| BSA continuous                 |                | 20                               |                             | 1774                                             |                 | 40                                  |                             | 3107                                             |
| Mean (SD)                      | 0.8 (0.7)      |                                  | 0.8 (0.8)                   |                                                  | 18.7 (16.0)     |                                     | 15 (15.2)                   |                                                  |
| Median (IQR)                   | 1.0 (0.0–1.0)  |                                  | 1.0 (0.0–1.0)               |                                                  | 12.0 (6.5–30.0) |                                     | 10.0 (5.0–19.0)             |                                                  |

|                                              |            |    |              |      |           |    |             |      |
|----------------------------------------------|------------|----|--------------|------|-----------|----|-------------|------|
| <b>PASI (range 0–72), n (%)</b>              |            | 20 |              | 1773 |           | 40 |             | 3105 |
| <b>≤10</b>                                   | 20 (100.0) |    | 1773 (100.0) |      | 30 (75.0) |    | 2231 (71.9) |      |
| <b>&gt;10</b>                                | -          |    | -            |      | 10 (25.0) |    | 874 (28.1)  |      |
| <b>IGA category, n (%)</b>                   |            | 20 |              | 1773 |           | 40 |             | 3104 |
| <b>0: Clear</b>                              | 6 (30.0)   |    | 690 (38.9)   |      | -         |    | 11 (<1.0)   |      |
| <b>1: Almost clear</b>                       | 9 (45.0)   |    | 590 (33.3)   |      | -         |    | 221 (7.1)   |      |
| <b>2: Mild</b>                               | -          |    | 353 (19.9)   |      | 14 (35.0) |    | 775 (25.0)  |      |
| <b>3: Moderate</b>                           | -          |    | 120 (6.8)    |      | 21 (52.5) |    | 1655 (53.3) |      |
| <b>4: Severe</b>                             | -          |    | 20 (1.1)     |      | -         |    | 442 (14.2)  |      |
| <b>Infections, n (%)</b>                     |            | 20 |              | 1774 |           | 40 |             | 3106 |
| <b>All</b>                                   | 10 (50.0)  |    | 483 (27.2)   |      | 19 (47.5) |    | 850 (27.4)  |      |
| <b>Serious</b>                               | -          |    | 58 (3.3)     |      | 6 (15.0)  |    | 135 (4.3)   |      |
| <b>Selected pathogens</b>                    | -          |    | 84 (4.7)     |      | 5 (12.5)  |    | 178 (5.7)   |      |
| <b>Hypertension, n (%)</b>                   | 6 (30.0)   | 20 | 584 (33.0)   | 1771 | 22 (55.0) | 40 | 1211 (39.0) | 3105 |
| <b>Other CVD (e.g. stroke) , n (%)</b>       | -          | 20 | 93 (5.2)     | 1774 | -         | 40 | 203 (6.5)   | 3107 |
| <b>Hyperlipidemia, n (%)</b>                 | 8 (40.0)   | 20 | 408 (23.0)   | 1771 | 8 (20.0)  | 40 | 819 (26.4)  | 3105 |
| <b>Diabetes mellitus, n (%)</b>              | -          | 20 | 203 (11.5)   | 1771 | 10 (25.0) | 40 | 503 (16.2)  | 3105 |
| <b>Asthma, n (%)</b>                         | -          | 20 | 99 (5.6)     | 1771 | 5 (12.5)  | 40 | 186 (6.0)   | 3105 |
| <b>Depression, n (%)</b>                     | 9 (45.0)   | 20 | 275 (15.5)   | 1771 | 10 (25.0) | 40 | 556 (17.9)  | 3105 |
| <b>Anxiety, n (%)</b>                        | 8 (40.0)   | 20 | 282 (15.9)   | 1771 | 9 (22.5)  | 40 | 551 (17.7)  | 3105 |
| <b>Treatment, n (%)</b>                      |            |    |              |      |           |    |             |      |
| <b>Biologic exposure, n (%)</b>              |            | 20 |              | 1774 |           | 40 |             | 3107 |
| <b>Bio-naïve</b>                             | 5 (25.0)   |    | 962 (54.2)   |      | 19 (47.5) |    | 1691 (54.4) |      |
| <b>1 previous</b>                            | 6 (30.0)   |    | 425 (24.0)   |      | 15 (37.5) |    | 740 (23.8)  |      |
| <b>≥2 previous</b>                           | 9 (45.0)   |    | 387 (21.8)   |      | 6 (15.0)  |    | 676 (21.8)  |      |
| <b>Non-biologic systemic exposure, n (%)</b> |            | 20 |              | 1774 |           | 40 |             | 3107 |
| <b>Systemic naïve</b>                        | -          |    | 1055 (59.5)  |      | 16 (40.0) |    | 1899 (61.1) |      |
| <b>1 previous</b>                            | -          |    | 596 (33.6)   |      | 18 (45.0) |    | 1003 (32.3) |      |
| <b>≥2 previous</b>                           | -          |    | 123 (6.9)    |      | 6 (15.0)  |    | 205 (6.6)   |      |
| <b>Phototherapy, n (%)</b>                   | 12 (60.0)  | 20 | 696 (39.2)   | 1774 | 14 (35.0) | 40 | 1257 (40.5) | 3106 |
| <b>Current therapy, n (%)</b>                |            | 19 |              | 1594 |           | 25 |             | 1698 |
| <b>TNFi</b>                                  | -          |    | 390 (24.5)   |      | 6 (24.0)  |    | 486 (28.6)  |      |
| <b>Non-TNFi biologic</b>                     | 12 (63.2)  |    | 1116 (70.0)  |      | 14 (56.0) |    | 915 (53.9)  |      |

|                                            |                 |    |                 |      |                  |    |                  |      |
|--------------------------------------------|-----------------|----|-----------------|------|------------------|----|------------------|------|
| <b>Systemic non-biologic</b>               | -               |    | 88 (5.5)        |      | 5 (20.0)         |    | 297 (17.5)       |      |
| <b>Patient-reported outcomes</b>           |                 |    |                 |      |                  |    |                  |      |
| <b>Itch VAS (range 0–100)</b>              |                 | 20 |                 | 1773 |                  | 40 |                  | 3101 |
| <b>Mean (SD)</b>                           | 35.2 (39.1)     |    | 16.2 (25.0)     |      | 53.9 (34.5)      |    | 46.4 (34.1)      |      |
| <b>Median (IQR)</b>                        | 16.0 (0.5–68.0) |    | 5.0 (0.0–20.0)  |      | 66.0 (17.0–85.0) |    | 50.0 (10.0–77.0) |      |
| <b>Fatigue VAS (range 0–100)</b>           |                 | 20 |                 | 1771 |                  | 40 |                  | 3101 |
| <b>Mean (SD)</b>                           | 33.6 (32.6)     |    | 22.2 (25.4)     |      | 47.0 (29.8)      |    | 33.6 (29.2)      |      |
| <b>Median (IQR)</b>                        | 28.0 (2.5–50.0) |    | 10.0 (0.0–40.0) |      | 50.0 (20.0–77.0) |    | 30.0 (5.0–55.0)  |      |
| <b>Pain VAS (range 0–100)</b>              |                 | 20 |                 | 1771 |                  | 40 |                  | 3099 |
| <b>Mean (SD)</b>                           | 25.7 (34.4)     |    | 8.3 (17.5)      |      | 36.8 (33.9)      |    | 29.0 (31.4)      |      |
| <b>Median (IQR)</b>                        | 7.5 (0.0–48.0)  |    | 0.0 (0.0–5.0)   |      | 25.0 (3.5–69.0)  |    | 15.0 (0.0–50.0)  |      |
| <b>PGA</b>                                 |                 | 20 |                 | 1771 |                  | 40 |                  | 3098 |
| <b>Mean (SD)</b>                           | 31.8 (32.1)     |    | 19.8 (24.3)     |      | 52.6 (28.6)      |    | 45.1 (29.2)      |      |
| <b>Median (IQR)</b>                        | 20.0 (4.0–58.0) |    | 10.0 (3.0–25.0) |      | 54.0 (25.0–80.0) |    | 50.0 (20.0–70.0) |      |
| <b>Currently employed, n (%)</b>           | 12 (60.0)       | 20 | 1278 (72.0)     | 1774 | 23 (57.5)        | 40 | 2050 (66.0)      | 3106 |
| <b>Percent work hours missed</b>           |                 | 10 |                 | 1142 |                  | 19 |                  | 1852 |
| <b>Mean (SD)</b>                           | 6.2 (12.4)      |    | 2.3 (11.6)      |      | 9.4 (13.4)       |    | 4 (14.8)         |      |
| <b>Median (IQR)</b>                        | 0.0 (0.0–7.0)   |    | 0.0 (0.0–0.0)   |      | 0.0 (0.0–20.0)   |    | 0.0 (0.0–0.0)    |      |
| <b>Percent overall work hours affected</b> |                 | 10 |                 | 1129 |                  | 40 |                  | 1832 |
| <b>Mean (SD)</b>                           | 16.5 (22.2)     |    | 6.3 (15.3)      |      | 27.4 (23.3)      |    | 14.3 (21.9)      |      |
| <b>Median (IQR)</b>                        | 2.5 (0.0–35.0)  |    | 0.0 (0.0–5.0)   |      | 20.0 (10.0–50.0) |    | 3.0 (0.0–20.0)   |      |
| <b>Percent daily activity impairment</b>   |                 | 20 |                 | 1761 |                  | 40 |                  | 3076 |
| <b>Mean (SD)</b>                           | 35.0 (38.8)     |    | 9.6 (19.9)      |      | 30.3 (29.9)      |    | 21.4 (27.3)      |      |
| <b>Median (IQR)</b>                        | 20.0 (0.0–73.0) |    | 0.0 (0.0–10.0)  |      | 20.0 (2.5–55.0)  |    | 8.0 (0.0–40.0)   |      |
| <b>DLQI score (range 0–30)</b>             |                 |    |                 |      |                  |    |                  |      |
| <b>Mean (SD)</b>                           | 6.5 (6.4)       |    | 4.3 (5.5)       |      | 8.4 (7.0)        |    | 7.7 (6.0)        |      |
| <b>Median (IQR)</b>                        | 3.0 (1.0–13.0)  |    | 2.0 (0.0–6.0)   |      | 5.0 (3.0–15.0)   |    | 6.0 (3.0–12.0)   |      |
| <b>'Effect on life', n (%)</b>             |                 | 20 |                 | 1769 |                  | 40 |                  | 3100 |
| <b>0: None</b>                             | 6 (30.0)        |    | 777 (43.9)      |      | -                |    | 424 (13.7)       |      |
| <b>1: Small</b>                            | -               |    | 503 (28.4)      |      | 17 (42.5)        |    | 976 (31.5)       |      |
| <b>2: Moderate</b>                         | -               |    | 245 (13.8)      |      | 6 (15.0)         |    | 763 (24.6)       |      |
| <b>3: Very large</b>                       | 7 (35.0)        |    | 186 (10.5)      |      | 11 (27.5)        |    | 824 (26.6)       |      |
| <b>4: Extremely large</b>                  | -               |    | 58 (3.3)        |      | -                |    | 113 (3.6)        |      |

|                                   |                  |    |                  |      |                  |    |                  |      |
|-----------------------------------|------------------|----|------------------|------|------------------|----|------------------|------|
| <b>Patient health state today</b> |                  | 20 |                  | 1767 |                  | 40 |                  | 3097 |
| <b>EQ-5D VAS (range 0–100)</b>    |                  |    |                  |      |                  |    |                  |      |
| <b>Mean (SD)</b>                  | 61.5 (26.2)      |    | 78.6 (19.2)      |      | 64.3 (22.8)      |    | 71.2 (21.3)      |      |
| <b>Median (IQR)</b>               | 59.0 (50.0–90.0) |    | 85.0 (70.0–90.0) |      | 70.0 (50.0–82.0) |    | 75.0 (60.0–90.0) |      |
| <b>EQ-5D-3L, n (%)</b>            |                  | 20 |                  | 1749 |                  | 40 |                  | 3072 |
| <b>Walking</b>                    | 8 (40.0)         |    | 335 (19.2)       |      | 13 (32.5)        |    | 766 (24.9)       |      |
| <b>Self-care</b>                  | -                |    | 81 (4.6)         |      | 10 (25.0)        |    | 206 (6.7)        |      |
| <b>Usual activities</b>           | 10 (50.0)        |    | 367 (21.0)       |      | 16 (40.0)        |    | 881 (28.7)       |      |
| <b>Pain/discomfort</b>            | 13 (65.0)        |    | 654 (37.4)       |      | 29 (72.5)        |    | 1637 (53.3)      |      |
| <b>Anxiety/depression</b>         | 10 (50.0)        |    | 364 (20.8)       |      | 13 (32.5)        |    | 876 (28.5)       |      |

*BMI, body mass index; BSA, body surface area; CVD, cardiovascular disease; DLQI, Dermatology Life Quality Index; EQ-5D-3L, EuroQol 5-Dimensions 3-Levels; GED, General Education Development; GPP, generalized pustular psoriasis; IGA, Investigator Global Assessment; IQR, interquartile range; PASI, Psoriasis Area Severity Index; PEST, Psoriasis Epidemiology Screening Tool; PGA, Patient Global Assessment; SD, standard deviation; TNFi, tumor necrosis factor inhibitor; VAS, visual analog scale. Only comorbidities with >5% incidence are shown. Categories are not an exhaustive list due to the small sample size*
