# Supplementary material for: The Disease Burden of Generalized Pustular Psoriasis: Real-World Evidence From CorEvitas’ Psoriasis Registry
Source: PubMed Central journal article supplement — J Psoriasis Psoriatic Arthritis. 2022 Mar 11;7(2):71–8. doi: 10.1177/24755303221079814 (PMC11361522; doi:10.1177/24755303221079814), 2022-03-11
Supplement: sj-pdf-2-jps-10.1177_24755303221079814.pdf [file sj-pdf-2-jps-10.1177_24755303221079814.pdf]

**Table S2: GPP and plaque psoriasis characteristics stratified by disease severity as defined by PASI**

| Characteristic                 | GPP<br>PASI ≤5 | GPP<br>PASI ≤5<br>sample<br>size | Plaque psoriasis<br>PASI ≤5 | Plaque<br>psoriasis<br>PASI ≤5<br>sample<br>size | GPP<br>PASI >5  | GPP<br>PASI >5<br>sample<br>size | Plaque psoriasis<br>PASI >5 | Plaque<br>psoriasis<br>PASI >5<br>sample<br>size |
|--------------------------------|----------------|----------------------------------|-----------------------------|--------------------------------------------------|-----------------|----------------------------------|-----------------------------|--------------------------------------------------|
| <b>Demographics</b>            |                |                                  |                             |                                                  |                 |                                  |                             |                                                  |
| Age, years, mean (SD)          | 51.3 (15.0)    | 38                               | 50.5 (14.2)                 | 3096                                             | 50.2 (13.5)     | 22                               | 50.9 (14.5)                 | 1790                                             |
| Sex, female, n (%)             | 24 (63.2)      | 38                               | 1454 (47.0)                 | 3096                                             | 12 (54.5)       | 22                               | 715 (39.9)                  | 1790                                             |
| Education, n (%)               |                | 37                               |                             | 3088                                             |                 | 22                               |                             | 1786                                             |
| High school graduate/GED       | 14 (37.8)      |                                  | 737 (23.9)                  |                                                  | 9 (40.9)        |                                  | 451 (25.3)                  |                                                  |
| College graduate/higher        | 13 (35.1)      |                                  | 1198 (38.8)                 |                                                  | 8 (36.4)        |                                  | 641 (35.9)                  |                                                  |
| Work status, n (%)             |                | 38                               |                             | 3091                                             |                 | 22                               |                             | 1787                                             |
| Full time                      | 18 (47.4)      |                                  | 1882 (60.9)                 |                                                  | 13 (59.1)       |                                  | 1040 (58.2)                 |                                                  |
| Part Time                      | -              |                                  | 258 (8.3)                   |                                                  | -               |                                  | 140 (7.8)                   |                                                  |
| Retired                        | 6 (15.8)       |                                  | 499 (16.1)                  |                                                  | -               |                                  | 282 (15.8)                  |                                                  |
| Disabled                       | 8 (21.1)       |                                  | 207 (6.7)                   |                                                  | -               |                                  | 161 (9.0)                   |                                                  |
| Other                          | -              |                                  | 245 (7.9)                   |                                                  | -               |                                  | 164 (9.2)                   |                                                  |
| Current smoker, n (%)          | 9 (24.3)       | 37                               | 492 (16.1)                  | 3063                                             | -               | 22                               | 327 (18.4)                  | 1773                                             |
| BMI categorical, n (%)         |                | 37                               |                             | 3051                                             |                 | 22                               |                             | 1767                                             |
| ≤24.9                          | 6 (16.2)       |                                  | 611 (20.0)                  |                                                  | -               |                                  | 316 (17.9)                  |                                                  |
| 25–29.9                        | 8 (21.6)       |                                  | 979 (32.1)                  |                                                  | -               |                                  | 508 (28.7)                  |                                                  |
| ≥30                            | 23 (62.2)      |                                  | 1461 (47.9)                 |                                                  | 12 (54.5)       |                                  | 943 (53.4)                  |                                                  |
| <b>Disease characteristics</b> |                |                                  |                             |                                                  |                 |                                  |                             |                                                  |
| Psoriasis duration, years      |                | 38                               |                             | 3065                                             |                 | 22                               |                             | 1775                                             |
| Mean (SD)                      | 10.8 (10.0)    |                                  | 14.7 (13.5)                 |                                                  | 14.2 (15.3)     |                                  | 14.6 (13.4)                 |                                                  |
| Median (IQR)                   | 8.0 (2.0–19.0) |                                  | 11.0 (3.0–22.0)             |                                                  | 11.0 (2.0–24.0) |                                  | 11.0 (4.0–21.0)             |                                                  |
| Psoriatic arthritis,<br>n (%)  | 21 (55.3)      | 38                               | 1095 (36.5)                 | 3000                                             | 6 (27.3)        | 22                               | 578 (33.0)                  | 1754                                             |
| PEST, n (%)                    |                | 38                               |                             | 3096                                             |                 | 22                               |                             | 1790                                             |

|                                        |                |    |                |      |                   |    |                   |      |
|----------------------------------------|----------------|----|----------------|------|-------------------|----|-------------------|------|
| <b>3+</b>                              | 17 (44.7)      |    | 854 (27.6)     |      | 6 (27.3)          |    | 480 (26.8)        |      |
| <b>BSA continuous, %</b>               |                | 38 |                | 3090 |                   | 22 |                   | 1788 |
| <b>Mean (SD)</b>                       | 6.1 (10.4)     |    | 4.2 (7.2)      |      | 24.3 (16.3)       |    | 19.6 (16.9)       |      |
| <b>Median (IQR)</b>                    | 2.0 (1.0, 6.0) |    | 2.0 (1.0, 5.0) |      | 20.0 (11.0, 30.0) |    | 14.0 (10.0, 25.0) |      |
| <b>IGA category, n (%)</b>             |                | 38 |                | 3092 |                   | 22 |                   | 1787 |
| <b>0: Clear</b>                        | -              |    | 696 (22.5)     |      | -                 |    | -                 |      |
| <b>1: Almost clear</b>                 | 9 (23.7)       |    | 797 (25.8)     |      | -                 |    | 16 (<1.0)         |      |
| <b>2: Mild</b>                         | 13 (34.2)      |    | 937 (30.3)     |      | 5 (22.7)          |    | 192 (10.7)        |      |
| <b>3: Moderate</b>                     | 9 (23.7)       |    | 598 (19.3)     |      | 13 (59.1)         |    | 1178 (65.9)       |      |
| <b>4: Severe</b>                       | -              |    | 64 (2.1)       |      | -                 |    | 398 (22.3)        |      |
| <b>History of comorbidities, n (%)</b> |                |    |                |      |                   |    |                   |      |
| <b>Infections</b>                      |                | 38 |                | 3095 |                   | 22 |                   | 1790 |
| <b>All</b>                             | 17 (44.7)      |    | 858 (27.7)     |      | 12 (54.5)         |    | 480 (26.8)        |      |
| <b>Serious</b>                         | 5 (13.2)       |    | 127 (4.1)      |      | -                 |    | 67 (3.7)          |      |
| <b>Selected pathogens</b>              | 7 (18.4)       |    | 158 (5.1)      |      | -                 |    | 104 (5.8)         |      |
| <b>Hypertension</b>                    | 18 (47.4)      | 38 | 1069 (34.6)    | 3091 | 10 (45.5)         | 22 | 728 (40.7)        | 1790 |
| <b>Other CVD (e.g. stroke)</b>         | -              | 38 | 177 (5.7)      | 3096 | -                 | 22 | 121 (6.8)         | 1790 |
| <b>Hyperlipidemia</b>                  | 11 (28.9)      | 38 | 736 (23.8)     | 3091 | 5 (22.7)          | 22 | 492 (27.5)        | 1790 |
| <b>Diabetes mellitus</b>               | 8 (21.1)       | 38 | 385 (12.5)     | 3091 | 5 (22.7)          | 22 | 323 (18.0)        | 1790 |
| <b>Asthma</b>                          | 5 (13.2)       | 38 | 183 (5.9)      | 3091 | -                 | 22 | 101 (5.6)         | 1790 |
| <b>Depression</b>                      | 14 (36.8)      | 38 | 528 (17.1)     | 3091 | 5 (22.7)          | 22 | 306 (17.1)        | 1790 |
| <b>Anxiety</b>                         | 13 (34.2)      | 38 | 542 (17.5)     | 3091 | -                 | 22 | 295 (16.5)        | 1790 |
| <b>Treatment, n (%)</b>                |                |    |                |      |                   |    |                   |      |
| <b>Biologic exposure</b>               |                | 38 |                | 3096 |                   | 22 |                   | 1790 |
| <b>Bio naïve</b>                       | 13 (34.2)      |    | 1706 (55.1)    |      | -                 |    | 952 (53.2)        |      |
| <b>1 previous</b>                      | 13 (34.2)      |    | 742 (24.0)     |      | -                 |    | 422 (23.6)        |      |
| <b>≥2 previous</b>                     | 12 (31.6)      |    | 648 (20.9)     |      | -                 |    | 416 (23.2)        |      |
| <b>Systemic exposure</b>               |                | 38 |                | 3096 |                   | 22 |                   | 1790 |
| <b>Systemic naïve</b>                  | 16 (42.1)      |    | 1894 (61.2)    |      | -                 |    | 1063 (59.4)       |      |
| <b>1 previous</b>                      | 15 (39.5)      |    | 1001 (32.3)    |      | -                 |    | 600 (33.5)        |      |
| <b>≥2 previous</b>                     | 7 (18.4)       |    | 201 (6.5)      |      | -                 |    | 127 (7.1)         |      |
| <b>Phototherapy</b>                    | 16 (42.1)      | 38 | 1222 (39.5)    | 3095 | 10 (45.5)         | 22 | 734 (41.0)        | 1790 |



|                                    |                  |    |                  |      |                  |    |                  |      |
|------------------------------------|------------------|----|------------------|------|------------------|----|------------------|------|
| <b>0: None</b>                     | 9 (23.7)         |    | 1035 (33.5)      |      | -                |    | 167 (9.4)        |      |
| <b>1: Small</b>                    | 15 (39.5)        |    | 967 (31.3)       |      | 8 (36.4)         |    | 511 (28.6)       |      |
| <b>2: Moderate</b>                 | -                |    | 548 (17.7)       |      | -                |    | 463 (25.9)       |      |
| <b>3: Very large</b>               | 9 (23.7)         |    | 447 (14.5)       |      | 9 (40.9)         |    | 565 (31.6)       |      |
| <b>4: Extremely large</b>          | -                |    | 91 (2.9)         |      | -                |    | 80 (4.5)         |      |
| <b>Patient health state today</b>  |                  | 38 |                  | 3084 |                  | 22 |                  | 1785 |
| <b>EQ-5D VAS (range 0–100)</b>     |                  |    |                  |      |                  |    |                  |      |
| <b>Mean (SD)</b>                   | 65.3 (24.6)      |    | 76.6 (19.4)      |      | 60.0 (22.5)      |    | 69.4 (22.3)      |      |
| <b>Median (IQR)</b>                | 70.0 (50.0–90.0) |    | 80.0 (70.0–90.0) |      | 70.0 (40.0–80.0) |    | 75.0 (60.0–85.0) |      |
| <b>EQ-5D-3L categorical, n (%)</b> |                  | 38 |                  | 3061 |                  | 22 |                  | 1765 |
| <b>Walking</b>                     | 13 (34.2)        |    | 644 (21.0)       |      | 8 (36.4)         |    | 460 (26.1)       |      |
| <b>Self-care</b>                   | 8 (21.1)         |    | 157 (5.1)        |      | 5 (22.7)         |    | 132 (7.5)        |      |
| <b>Usual activities</b>            | 19 (50.0)        |    | 729 (23.8)       |      | 7 (31.8)         |    | 521 (29.5)       |      |
| <b>Pain/discomfort</b>             | 26 (68.4)        |    | 1305 (42.6)      |      | 16 (72.7)        |    | 989 (56.0)       |      |
| <b>Anxiety/depression</b>          | 18 (47.4)        |    | 735 (24.0)       |      | 5 (22.7)         |    | 507 (28.7)       |      |

BMI, body mass index; BSA, body surface area; CVD, cardiovascular disease; DLQI, Dermatology Life Quality Index; EQ-5D-3L, EuroQol 5-Dimensions 3-Levels; GED, General Education Development; GPP, generalized pustular psoriasis; IGA, Investigator Global Assessment; IQR, interquartile range; PASI, Psoriasis Area Severity Index; PEST, Psoriasis Epidemiology Screening Tool; PGA, Patient Global Assessment; SD, standard deviation; TNFi, tumor necrosis factor inhibitor; VAS, visual analog scale. Only comorbidities with >5% incidence are shown. Categories are not an exhaustive list due to the small sample size.
